# Supplementary material for: Five‐Year Change in the Renal Function After Catheter Ablation of Atrial Fibrillation
Source: PubMed Central journal article supplement — J Am Heart Assoc. 2019 Aug 31;8(17):e013204. doi: 10.1161/JAHA.119.013204 (PMC6755838; doi:10.1161/jaha.119.013204), 2019-08-31
Supplement: JAH3-8-e013204-s001.pdf [file JAH3-8-e013204-s001.pdf]

# **Supplemental Material**

**Table S1. Logistic regression analysis for variables predicting an improved renal function ( $\Delta eGFR_{5yr} \geq 1$ ) after 5-years of follow-up (n=2,284).**

|                                             | Univariate          |                  | Multivariate Model  |                  |
|---------------------------------------------|---------------------|------------------|---------------------|------------------|
|                                             | OR (95% CI)         | P-value          | OR (95% CI)         | P-value          |
| Age                                         | 0.979 (0.972-0.987) | <b>&lt;0.001</b> | 0.980 (0.972-0.989) | <b>&lt;0.001</b> |
| Male                                        | 0.899 (0.747-1.082) | 0.261            |                     |                  |
| Body mass index                             | 1.016 (0.988-1.044) | 0.264            |                     |                  |
| CHA <sub>2</sub> DS <sub>2</sub> VASc score | 0.952 (0.902-1.004) | 0.070            |                     |                  |
| CHF                                         | 0.717 (0.484-1.063) | 0.098            |                     |                  |
| Hypertension                                | 0.846 (0.718-0.998) | <b>0.047</b>     | 1.008 (0.829-1.226) | 0.938            |
| Diabetes                                    | 0.897 (0.721-1.116) | 0.329            |                     |                  |
| Stroke/TIA                                  | 0.955 (0.737-1.236) | 0.725            |                     |                  |
| Vascular disease                            | 1.041 (0.825-1.312) | 0.737            |                     |                  |
| ACEi/ARB use                                | 0.814 (0.686-0.965) | <b>0.018</b>     | 0.885 (0.727-1.078) | 0.224            |
| BB use                                      | 0.865 (0.722-1.037) | 0.118            |                     |                  |
| Statin use                                  | 0.996 (0.830-1.195) | 0.965            |                     |                  |
| AFCA                                        | 1.844 (1.522-2.233) | <b>&lt;0.001</b> | 1.845 (1.521-2.237) | <b>&lt;0.001</b> |

OR = odd ratio, CI = confidence interval, CHF = congestive heart failure, TIA = transient ischemic attack, ACEi = angiotensin-converting enzyme inhibitor, ARB = angiotensin type II receptor blocker, BB = beta blocker, AFCA = atrial fibrillation catheter ablation.

**Table S2. Logistic regression analysis for variables predicting an improved renal**

function ( $\Delta\text{eGFR}_{5\text{yr}} > 5$ ) after 5-years of follow-up (n=2,284).

|                                             | Univariate          |                  | Multivariate Model  |                  |
|---------------------------------------------|---------------------|------------------|---------------------|------------------|
|                                             | OR (95% CI)         | P-value          | OR (95% CI)         | P-value          |
| Age                                         | 0.979 (0.971-0.987) | <b>&lt;0.001</b> | 0.980 (0.927-0.989) | <b>&lt;0.001</b> |
| Male                                        | 0.840 (0.697-1.012) | 0.067            |                     |                  |
| Body mass index                             | 1.011 (0.983-1.039) | 0.464            |                     |                  |
| CHA <sub>2</sub> DS <sub>2</sub> VASc score | 0.949 (0.898-1.002) | 0.060            |                     |                  |
| CHF                                         | 0.750 (0.502-1.121) | 0.161            |                     |                  |
| Hypertension                                | 0.825 (0.698-0.974) | <b>0.024</b>     | 1.033 (0.846-1.261) | 0.750            |
| Diabetes                                    | 0.758 (0.605-0.949) | <b>0.016</b>     | 0.838 (0.663-1.060) | 0.140            |
| Stroke/TIA                                  | 1.040 (0.802-1.350) | 0.767            |                     |                  |
| Vascular disease                            | 0.976 (0.771-1.235) | 0.839            |                     |                  |
| ACEi/ARB use                                | 0.784 (0.659-0.932) | <b>0.006</b>     | 0.857 (0.702-1.046) | 0.129            |
| BB use                                      | 0.853 (0.710-1.026) | 0.091            |                     |                  |
| Statin use                                  | 0.959 (0.797-1.154) | 0.657            |                     |                  |
| AFCA                                        | 1.223 (1.010-1.481) | <b>0.039</b>     | 1.225 (1.010-1.486) | <b>0.039</b>     |

OR = odd ratio, CI = confidence interval, CHF = congestive heart failure, TIA = transient

ischemic attack, ACEi = angiotensin-converting enzyme inhibitor, ARB = angiotensin type II

receptor blocker, BB = beta blocker, AFCA = atrial fibrillation catheter ablation.

**Table S3. Linear regression analysis for variables predicting a change in eGFR**

( $\Delta\text{eGFR}_{5\text{yr}}$ ) after 5-years of follow-up (n=2,284).

|                                             | Univariate                |                  | Multivariate Model        |                  |
|---------------------------------------------|---------------------------|------------------|---------------------------|------------------|
|                                             | B (95% CI)                | P-value          | B (95% CI)                | P-value          |
| Age                                         | -0.200 (-0.263 to -0.136) | <b>&lt;0.001</b> | -0.173 (-0.240 to -0.105) | <b>&lt;0.001</b> |
| Male                                        | -1.398 (-2.886 to 0.090)  | 0.066            |                           |                  |
| Body mass index                             | 0.239 (0.016 to 0.461)    | <b>0.035</b>     | 0.256 (0.028 to 0.485)    | <b>0.028</b>     |
| CHA <sub>2</sub> DS <sub>2</sub> VASc score | -0.713 (-1.141 to -0.285) | <b>0.001</b>     |                           |                  |
| CHF                                         | -0.402 (-3.490 to 2.687)  | 0.799            |                           |                  |
| Hypertension                                | -1.658 (-2.978 to -0.337) | <b>0.014</b>     | 0.568 (-1.017 to 2.153)   | 0.482            |
| Diabetes                                    | -2.394 (-4.141 to -0.647) | <b>0.007</b>     | -1.576 (-3.368 to 0.216)  | 0.085            |
| Stroke/TIA                                  | -1.387 (-3.458 to 0.683)  | 0.189            |                           |                  |
| Vascular disease                            | -0.471 (-2.338 to 1.395)  | 0.621            |                           |                  |
| ACEi/ARB use                                | -2.214 (-3.576 to -0.852) | <b>0.001</b>     | -1.614 (-3.172 to -0.056) | <b>0.042</b>     |
| BB use                                      | -2.060 (-3.506 to -0.613) | <b>0.005</b>     | -1.723 (-3.199 to -0.246) | <b>0.022</b>     |
| Statin use                                  | -0.945 (-2.408 to 0.519)  | 0.206            |                           |                  |
| AFCA                                        | 2.553 (1.030 to 4.077)    | <b>0.001</b>     | 2.439 (0.929 to 3.949)    | <b>0.002</b>     |

CI = confidence interval, CHF = congestive heart failure, TIA = transient ischemic attack, ACEi = angiotensin-converting enzyme inhibitor, ARB = angiotensin type II receptor blocker, BB = beta blocker, AFCA = atrial fibrillation catheter ablation

**Table S4. Logistic regression analysis of the baseline risk factors predicting advanced CKD among the overall patients with AFCA (n=571).**

|  | Univariate | Multivariate |
|--|------------|--------------|
|--|------------|--------------|

|                                             | OR (95% CI)         | p-value          | OR (95% CI)         | p-value          |
|---------------------------------------------|---------------------|------------------|---------------------|------------------|
| Age                                         | 1.111 (1.074-1.149) | <b>&lt;0.001</b> | 1.105 (1.066-1.145) | <b>&lt;0.001</b> |
| Male                                        | 1.142 (0.637-2.048) | 0.655            |                     |                  |
| PAF at procedure                            | 0.579 (0.345-0.970) | <b>0.038</b>     | 0.784 (0.427-1.440) | 0.433            |
| Body mass index                             | 1.046 (0.958-1.142) | 0.318            |                     |                  |
| Body surface area                           | 1.222 (0.279-5.355) | 0.790            |                     |                  |
| CHA <sub>2</sub> DS <sub>2</sub> VASc score | 1.535 (1.308-1.800) | <b>&lt;0.001</b> |                     |                  |
| Congestive heart failure                    | 2.440 (1.004-5.927) | <b>0.049</b>     | 2.057 (0.756-5.593) | 0.158            |
| Hypertension                                | 3.235 (1.816-5.763) | <b>&lt;0.001</b> | 1.858 (0.987-3.497) | 0.055            |
| Diabetes                                    | 2.711 (1.541-4.769) | <b>0.001</b>     | 1.542 (0.817-2.910) | 0.181            |
| Stroke/TIA                                  | 1.376 (0.665-2.844) | 0.389            |                     |                  |
| Vascular disease                            | 1.945 (1.065-3.552) | <b>0.030</b>     | 0.952 (0.489-1.852) | 0.885            |
| LA dimension                                | 1.070 (1.026-1.115) | <b>0.002</b>     | 1.054 (1.001-1.110) | <b>0.046</b>     |
| LVEF                                        | 0.983 (0.954-1.013) | 0.268            |                     |                  |
| E/Em                                        | 1.036 (0.992-1.081) | 0.110            |                     |                  |

CKD = chronic kidney disease, AFCA = atrial fibrillation catheter ablation, PAF = paroxysmal atrial fibrillation, TIA = transient ischemic attack, LA = left atrium, LVEF = left ventricular ejection fraction, E/Em = the ratio of the early diastolic mitral inflow velocity (E) to the early diastolic mitral annular velocity (Em)

**Figure S1. Kaplan-Meier analysis of an AF/AT recurrence after a single AF ablation (A) and the last AF ablation (B) according to baseline advanced CKD.**

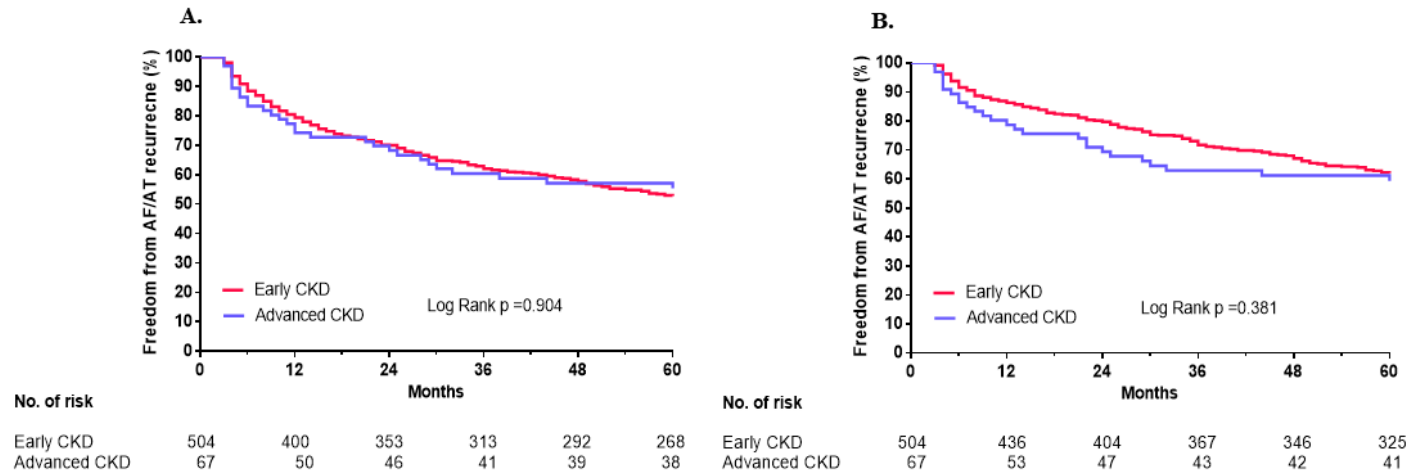

AF = atrial fibrillation, AT = atrial tachycardia, CKD = chronic kidney disease.
